1                   **High-throughput physiological profiling of endosymbiotic dinoflagellates**  
2                                           **(Symbiodiniaceae) using flow cytometry**

3

4                                           Colin J. Anthony<sup>\*</sup>, Colin C. Lock, Bastian Bentlage<sup>†</sup>

5                                           *Marine Laboratory, University of Guam, Mangilao, Guam, USA*

6

7   \* [colin\\_anthonynw@outlook.com](mailto:colin_anthonynw@outlook.com)

8   † [bentlageb@triton.uog.edu](mailto:bentlageb@triton.uog.edu)

9

10 **Short title:** Physiological profiling of Symbiodiniaceae via flow cytometry

11

12 **Keywords:** protocol, autofluorescence, photosynthesis, photopigments, chlorophyll, peridinin,  
13 antioxidants, symbiosis, coral reefs, Cnidaria

## 14 **Abstract**

15 Endosymbiotic dinoflagellates (Family Symbiodiniaceae) are directly responsible for coral  
16 survival during climate change, as the breakdown of the coral-dinoflagellate symbiosis leads to  
17 coral bleaching and often mortality. Despite methodological progress, assessing the physiology  
18 of Symbiodiniaceae *in hospite* remains a complex task. Bio-optics, biochemistry, or “-omics”  
19 techniques are expensive, often inaccessible to investigators, or lack the resolution required to  
20 understand single-cell physiological states within endosymbiotic dinoflagellate assemblages. To  
21 help address this issue, we developed a protocol that generates a physiological profile of  
22 Symbiodiniaceae cells while simultaneously determining cell densities using an entry-level  
23 benchtop flow cytometer. Two excitation/emission profiles in the red spectrum target light  
24 harvesting complex (LHC)-associated pigments, while green and yellow autofluorescence  
25 provides insight into antioxidant-associated pigments. Excitation/emission profiles are generated  
26 for each individual cell, simultaneously profiling thousands of Symbiodiniaceae cells, thus  
27 increasing statistical power to discriminate between groups even when effect sizes are small. As  
28 flow cytometry is adopted as a robust and efficient method for endosymbiont cell counting,  
29 integration and expansion of our protocol into existing workflows allows quantification of  
30 endosymbiont photophysiology and stress-signatures with minimal additional effort.

31

## 32 **Introduction**

33 Symbiodiniaceae are dinoflagellates known for their endosymbiotic relationship with many  
34 marine invertebrates, most notably reef building corals (LaJeunesse et al., 2018). The breakdown  
35 of this symbiosis can lead to coral bleaching and mortality (Hoegh-Guldberg 1999). Despite  
36 methodological progress identifying functional and genetic variation in Symbiodiniaceae,  
37 assessing trait variation of Symbiodiniaceae *in hospite* remains a complex task (Davies et al.,  
38 2022). Pulse Amplitude Modulated (PAM) fluorometry is widely used to quantify photosynthetic  
39 efficiency of Symbiodiniaceae photosystems *in hospite* (Warner et al. 1996) both *in situ* (e.g.  
40 Suwa et al. 2008) and *ex situ* (e.g. Berg et al. 2021). However, PAM fluorometry provides an  
41 aggregate measure of photosystem performance for the Symbiodiniaceae population and does  
42 not quantify variation in photosystem performance between cells within the symbiont population.  
43 Isolation, characterization, and quantification of photopigments is laborious and time consuming,  
44 relying on the extraction of pigments from cells prior to analysis, followed by the normalization  
45 of measured pigment quantities to observed cell densities or overall protein content (e.g. Hennige  
46 et al. 2009; Fernandes de Barros Marongoni et al. 2020).

47 By contrast, flow cytometry has been used to quantify photophysiological parameters  
48 from both plankton (Dubelaar and Jonker 2000) and cnidarian-associated Symbiodiniaceae (Lee  
49 et al. 2012), is commonly used for determining endosymbiont cell densities (Krediet et al. 2015),  
50 and requires comparatively little sample preparation. However, Symbiodiniaceae photosystem  
51 composition differs from other photoautotrophs, a fact that needs to be considered during data  
52 interpretation. Additionally, the impact of batch effects and sample degradation has not been  
53 well-studied for applications that employ flow cytometry for physiological profiling of  
54 Symbiodiniaceae. To address these issues and provide guidelines for simultaneously quantifying

55 Symbiodiniaceae cell densities and physiological profiles, we developed an efficient and  
56 consistent flow cytometry protocol that can be directly integrated into commonly used  
57 workflows. Our protocol generates profiles from individual cells using the high-throughput  
58 capabilities of flow cytometers, thus generating large sample sizes across multiple parameters.  
59 This protocol may be used to identify functional differences in Symbiodiniaceae assemblages  
60 between host species, sampling sites and timepoints, and potentially niche partitioning of  
61 Symbiodiniaceae populations within a single host.

62

## 63 **Materials and Methods**

### 64 *Protocol*

65 The protocol described in this article was developed using the Guava easyCyte 6HT-2L  
66 (Luminex Corporation, Austin, TX) benchtop flow cytometer and is available through  
67 protocols.io, (<https://dx.doi.org/10.17504/protocols.io.dm6gpjr2jgzp/v1>) and included as File S1  
68 of this article for printing.

### 69 *Symbiodiniaceae autofluorescence*

70 Our flow cytometry protocol relies on two excitation lasers (blue and red) and emission detectors  
71 in the green, yellow, and red spectra. Excitation-emission profiles used are as follows: (1) red  
72 fluorescence (695/50 nm) off the blue (488 nm) excitation laser (RED-B), (2) red fluorescence  
73 (661/15 nm) off of the red (642 nm) excitation laser (RED-R), (3) green fluorescence (525/30  
74 nm) and (4) yellow fluorescence (583/26 nm) off the blue (488 nm) excitation laser (GRN-B and  
75 YEL-B respectively).

76 Symbiodiniaceae autofluorescent signatures are dominated by photosynthetic pigments  
77 such as chlorophylls and carotenoids. Autofluorescent pigments previously identified from  
78 Symbiodiniaceae include beta-carotene, chlorophylls *a* and *c*<sub>2</sub>, diadinoxanthin, diatoxanthin, and  
79 peridinin (Venn et al. 2006; Hennige et al. 2009). We also identified flavin-based fluorescent  
80 proteins (FbFPs) as a probable source of autofluorescence (Koziol et al. 2007; Mukherjee et al.  
81 2013). To identify our autofluorescent targets, spectral properties of chl *a* and riboflavin (FbFPs),  
82 compensated for blue (488 nm) and red (642 nm) laser excitation were visualized using  
83 FluoroFinder Spectra Viewer (<https://app.fluorofinder.com/ffsv/svs/>). Peridinin, beta-carotene  
84 (Koyama and Hashimoto 1993), diadinoxanthin (Kagatani et al. 2022) and chl *c*<sub>2</sub> (Zapata et al.  
85 2001; Yacobi 2012) spectra were mapped to each other using the FluoroFinder spectra and  
86 absorbance spectra from Bricaud et al. (2004).

### 87 *Optimization assays*

88 Two assays were performed to provide a framework for optimizing the protocol presented here.  
89 We also explored the integrity of fluorescent pigments when exposed to variations in light and  
90 temperature to provide guidelines for sample processing.

91 (1) Assay one was used to determine the impacts of time, temperature, and light  
92 conditions on samples and the resulting data. A single staghorn coral (*Acropora pulchra*)  
93 fragment was airbrushed with filtered, sterile seawater to create a 30 mL tissue slurry. The slurry  
94 was homogenized by vortexing and needle shearing, then equally distributed across four 50 mL  
95 falcon tubes. 1 mL was aliquoted from each falcon tube and immediately processed using our  
96 cytometry protocol (File S1). After aliquots were removed, falcon tubes were separated and  
97 exposed to one of four conditions: (1) dark on ice, (2) dark at room temperature (RT = 22°C), (3)

98 ambient light on ice, and (4) ambient light at RT. A 1 mL sample from each falcon tube was  
99 processed approximately every two hours for a total of eight hours; a final set of samples was  
100 processed after being stored in their respective conditions overnight. This yielded six samples  
101 taken at 43, 136, 236, 344, 470, and 1459 minutes after removing tissue from the skeleton. For  
102 flow cytometry, three across-well and two within-well replicates were used for data collection.

103 (2) Assay two was used to optimize tissue slurry dilutions and to identify possible effects  
104 of flow cytometer run times. We prepared six 1 mL tissue slurries from a single *Acropora*  
105 *pulchra* fragment for flow cytometry using our protocol (File S1). Before loading samples into a  
106 96-well microwell plate, all processed tissue slurries were combined into a single 50 mL falcon  
107 tube, needle sheared, and vortexed to homogenize samples to avoid possible batch effects. 50x,  
108 20x, 10x, 5x, 2x, and 1x dilutions of the combined tissue slurry were prepared directly in the 200  
109 uL wells. We created a total of 16 dilution series replicates, filling all 96 wells of the plate. Each  
110 replicate dilution (2 technical replicates) was processed at ~5 min intervals until the run was  
111 complete.

## 112 ***Empirical application***

113 To test our protocol empirically, three groups of clonal, tank-acclimated upside-down jellyfish  
114 medusae (*Cassiopea* sp.) were placed into three different conditions for three weeks. Group 1  
115 (n=4) was placed in low-light conditions (50% shade), group 2 in high-light conditions (no  
116 shade) (n=4), and group 3 experienced variable environmental conditions (n=5) rotating from  
117 high-light to low-light to high-light (one week per condition). At the end of three weeks, digitate  
118 ciri (clusters of tentacle-like structures attached to the top of each oral arm) were sampled with

119 sterile scissors from each individual and placed in 1 mL of filtered seawater and  
120 Symbiodiniaceae cells extracted and processed following our flow cytometry protocol (File S1).

121 To test for differences in means across experimental groups, non-parametric Kruskal-  
122 Wallis tests ( $X^2$ ) followed by post-hoc pairwise Dunn tests ( $Z$ ) were performed using the FSA R  
123 package v0.9.3 (Ogle et al. 2022). All data processing and analysis was completed with R v4.1.2  
124 (R Core Team 2021) in RStudio v1.3.1073 (RStudio Team 2020). Figures were generated and  
125 modified with a combination of ggplot2 v3.3.5 (Wickham 2016), ggpubr v0.4.0 (Kassambara  
126 2020), and InkScape v1.1 (<https://inkscape.org>).

127

## 128 **Results**

### 129 *Autofluorescent pigment identification*

130 Red light emission caused by excitation with a blue laser (RED-B) represents the core light  
131 harvesting complex (LHC) pigment peridinin (Supasri et al., 2021; Kawalska et al., 2013; Jiang  
132 et al., 2012; Bujak et al., 2009) (Fig 1A). Red light emission caused by excitation with the red  
133 laser (RED-R) represents a combined emission/excitation signature of chlorophyll *a* and  
134 chlorophyll *c*<sub>2</sub> (chl *a* & chl *c*<sub>2</sub>) (Niedzwiedzki et al., 2014; Scheer, 2006) despite the suboptimal  
135 excitation wavelength (642 nm) (Fig 1B).

136 **Fig 1** Excitation/emission spectra employed by the flow cytometry protocol presented in this  
137 contribution. Excitation laser wavelengths are indicated by arrows. Lines depict absorption  
138 spectra, while lines with shaded areas illustrate compensated emission wavelengths based on the  
139 corresponding excitation laser. **A)** The blue laser (488 nm) simultaneously excited FbFPs,

140 diadinoxanthin, beta-carotene, and peridinin, but emission filters helped identify different  
141 pigments (**grey boxes** **B**) The red laser (642 nm) excited chl *a* and chl *c*<sub>2</sub> with a bias towards chl  
142 *c*<sub>2</sub>.

143 Increased green fluorescence in dinoflagellates under stress has been attributed to beta-  
144 carotene (Lee et al., 2012; Kleinegris et al., 2010). However, diadinoxanthin, diatoxanthin  
145 (Kagatani et al. 2022; Frank et al. 1996), and flavin-based fluorescent proteins (FbFPs)  
146 (Mukherjee et al. 2013; Koziol et al. 2007; Fujita et al. 2005) also emit green fluorescent light  
147 when excited by blue light (Fig 1A). Therefore, we inferred that both GRN-B and YEL-B  
148 represents the combined signature of beta-carotene, xanthophylls (diadinoxanthin and  
149 diatoxanthin), and flavins (Fig 1A).

### 150 *Effects of sample preparation on degradation*

151 Samples stored on ice and processed within approximately two hours (136 minutes) showed the  
152 most consistent signatures across all measurements (Fig 2). RED-B and RED-R autofluorescence  
153 degraded relatively quickly at ambient temperatures, but light exposure alone does not appear to  
154 have a strong effect (Figs 2A-B). GRN-B remained stable during the first two hours, regardless  
155 of treatment, but variability increased after longer incubation (Fig 2C). Interestingly, cell  
156 concentrations were more stable under ambient temperatures, but still produced consistent results  
157 when processed within 136 minutes after being stored on ice (Fig 2D).

158 **Fig 2** Samples prepared under different light (dark vs ambient light) and temperature (on ice vs  
159 no ice) conditions produced different parameter estimates. Only samples processed on ice within  
160 roughly two hours (136 minutes) of airbrushing yielded consistent results (**dashed boxes**). RED-  
161 B (**A**) and RED-R (**B**) autofluorescence degraded quickly, but GRN-B (**C**) remained relatively



162 stable over time. Interestingly, cell concentrations (**D**) were more stable under ambient  
163 conditions (no ice) but produced relatively consistent results when processed within 136 minutes  
164 after being stored on ice.

### 165 *Effects of dilution and flow cytometer run-time on degradation*

166 Six dilutions (50x, 20x, 10x, 5x, 2x, and 1x) were tested 16 times each across a 96-well plate  
167 resulting in individual sample measurements of ~150,000 cells/mL for each replicate (Fig 3).  
168 The flow cytometer run took around six hours to complete. Ten-fold and five-fold dilutions in  
169 the first four rows of the 96-well plate were the most consistent. More diluted samples produced  
170 unstable means of measured parameters, while less diluted samples exacerbated degradation.  
171 RED-B fluorescence degraded with time (Fig 3A), while RED-R, GRN-B, and YEL-B  
172 fluorescence increased with time (Fig 3B-D). Cell size (forward scatter) did not show any effects  
173 of degradation, but highly concentrated samples over estimated size, likely due to cell clumping  
174 (Fig 3E). Cell roughness (side scatter) is the most stable metric suggesting low rates of cell lysis,  
175 though increasing quartile ranges in the one-fold and two-fold dilutions suggest increased  
176 susceptibility to lysis in higher concentrations (Fig 3F). Estimates of cell concentrations were  
177 heavily affected by dilution and run-time (Fig 3G).

178 **Fig 3** Six dilutions (50x, 20x, 10x, 5x, 2x, and 1x) were tested 16 times each across a 96-well  
179 plate. The cytometry run took ~6 hours estimating ~20 minutes between each of the 16 replicates  
180 (**Time**). Ten-fold and five-fold dilutions were the most consistent for half of the plate (**dashed**  
181 **boxes**) suggesting that runs should be limited to  $\leq 48$  wells (half of a standard 96-well plate).  
182 Over- or under-dilution of samples had a large effect on resulting parameter estimates. **A**) RED-  
183 B (peridinin) fluorescence degraded over time and had more variation with 50x and 20x

184 dilutions. **B-D**) RED-R, GRN-B, and YEL-B fluorescence increased over time, presumably due  
185 to heat generated by the flow cytometer. **E**) Cell size (FSC) did not change over time, but highly  
186 concentrated samples led to an over estimation of cell sizes, likely due to cell clumping. **F**) Cell  
187 roughness (SSC) was the most stable parameter, suggesting low rates of cell lysis. **G**) Cell  
188 concentrations were heavily affected by dilution and time spent in the flow cytometer.

### 189 *Upside-down jellyfish light acclimation experiment*

190 After three weeks, *Cassiopea* medusae visibly changed color with dark-acclimated individuals  
191 being dark brown and light-acclimated individuals being light tan. After identifying the  
192 Symbiodiniaceae cells based on a combination of forward, side scatter, and red autofluorescence  
193 (RED-B) (Krediet et al. 2015), noise was removed from the dataset (RED-B-HLog < 3.04001),  
194 yielding 16,134, 18,464, and 19,821 single-cell fluorescent profiles from Symbiodiniaceae of  
195 *Cassiopea* from the dark, light, and variable treatment groups, respectively. Treatment  
196 influenced fluorescent means for all excitation/emission parameters: RED-B ( $X^2 = 386.96$ ,  $p <$   
197  $0.001$ ), RED-R ( $X^2 = 316.25$ ,  $p < 0.001$ ), and GRN-B ( $X^2 = 535.50$ ,  $p < 0.001$ ). All post-hoc  
198 pairwise comparisons demonstrated a difference in means ( $p < 0.01$ ). The only comparison with  
199 an adjusted p-value > 0.001 was the dark vs variable RED-B comparison ( $p = 0.002$ ). Light-  
200 acclimated individuals had the lowest peridinin (RED-B) and chl *a* & *c*<sub>2</sub> (RED-R) signals, while  
201 dark-acclimated individuals had the lowest green emission signal ('antioxidant' pigments) (Fig  
202 4).

203 **Fig 4** Digitate cirri from the upside-down jellyfish, *Cassiopea* sp., were sampled and processed  
204 with our flow cytometry protocol (S1 File) after three weeks of exposure to different light  
205 conditions. Each pairwise comparison indicated statistically significant differences in means ( $p <$

206 0.01); the most distinct distribution ( $p < 0.001$ ) is indicated by “\*\*\*\*”. Each distribution  
207 represents 16,000 - 20,000 observations, which allowed for discriminating between treatments,  
208 even with small effect size. **A)** Light-acclimated individuals had the least red fluorescence off of  
209 the blue laser (peridinin). **B)** Light-acclimated individuals also had the lowest red fluorescence  
210 off of the red laser (chl  $a$  &  $c_2$ ). **C)** Dark-acclimated individuals had the lowest green  
211 fluorescence (antioxidants).

212

## 213 **Discussion**

### 214 *Symbiodiniaceae pigments and autofluorescence signatures*

215 Symbiodinaceae possess two major LHC antennae, the peridinin-chlorophyll  $a$  protein complex  
216 (PCP) and the chlorophyll  $a$ -chlorophyll  $c_2$ -peridinin protein complex (acpPC), which use  
217 peridinin and chl  $c_2$  as the primary light-harvesting pigments (Polívkaa et al. 2007; Hiller et al.  
218 1993). A proportionate decrease in RED-B (peridinin) and RED-R (chl  $a$  &  $c_2$ ) would indicate a  
219 decrease in overall LHC abundance within the cell. Alternatively, a shift in red fluorescent ratios  
220 (RED-B vs RED-R) would indicate LHC reorganization from PCP to acpPC. For example, PCP  
221 complexes have been proposed to detach from the thylakoid membrane as a mode of photo-  
222 acclimation (Kanazawa et al. 2014; Jiang et al. 2012; Schulte et al. 2010). Detachment from the  
223 membrane and relocation of PCP would allow for the reduction of absorbed photons to protect  
224 photosynthetic reaction centers during periods of environmental stress, while photoprotective  
225 acpPC complexes remain bound to the thylakoid membrane during photo-acclimation. This PCP  
226 mobilization should yield a shift in RED-B vs RED-R ratios given the variable pigment  
227 compositions of the PCP and acpPC antennae.

228 Green and yellow autofluorescent signatures are representative of photo-protective and  
229 antioxidant pigments and proteins (Fig 1A). Reactive oxygen species (ROS) are a well-known  
230 byproduct of photosynthesis, which can cause cellular damage in high concentrations, especially  
231 under environmental stress (Lesser 2006). Beta-carotene is an efficient reactive oxygen species  
232 (ROS) scavenger, especially in the vicinity of high concentrations of ROS (Burton 1990; Young  
233 & Britton 1993). Diadinoxanthin and diatoxanthin are the main components in the  
234 photoprotective xanthophyll cycle, dissipating excess energy through non-photosynthetic  
235 quenching (Frank et al. 1996), alongside production of antioxidants (Smerilli et al. 2016). The  
236 most abundant FbFPs (cryptochromes and riboflavin) act as key stress regulators (D’Amico-  
237 Damião et al. 2018; Yu 2010) and induce the accumulation of antioxidants (Deng et al. 2013;  
238 Taheri and Tarighi 2010; Sandoval et al. 2008). Given the overlap in the roles of fluorescent  
239 proteins detected by GRN-B and YEL-B, we interpret green and yellow fluorescence as  
240 signatures of stress-mitigation, including excess energy dissipation through non-photosynthetic  
241 quenching and antioxidant activity.

#### 242 ***Protocol performance and optimization***

243 Photopigments are fragile molecules prone to degradation in ambient conditions (Schoefs 2002).  
244 Therefore, it is important to work consistently and efficiently when processing samples using the  
245 protocol presented here. Samples processed at room temperature were prone to rapid  
246 degradation, yielding imprecise estimates of fluorescent parameters compared to consistent  
247 autofluorescence-based physiological profiles for samples stored and processed on ice (Fig 2).  
248 However, autofluorescent signatures still changed dramatically after tissue removal from coral  
249 skeletons when processing was delayed, even when stored on ice. Based on our observations (Fig

250 2), we recommend that samples are processed for flow-cytometry within two hours of beginning  
251 sample preparation.

252 Cell concentration and flow-cytometer run-time are further factors to consider. Our  
253 sample had a starting concentration of ~150,000 cells/mL. Over-dilution led to variable means of  
254 parameters and high variances, while under-dilution exacerbated degradation and caused cell  
255 clumping (Fig 3). Ten- to five-fold dilutions (15,000 – 30,00 cells/mL) produced the most  
256 consistent autofluorescence signatures. Nonetheless, samples began to degrade after processing  
257 four rows (48 wells) of the 96-well plate. Therefore, we recommend loading no more than half of  
258 a 96-well plate per run with each well containing an estimated concentration of 15,000-30,000  
259 cells/mL. The analyses presented here provide a roadmap for implementing and optimizing our  
260 flow-cytometry protocol. We recommend investing protocol optimization time upfront. Once  
261 established, our protocol should work across a diverse set of cnidarian hosts including corals,  
262 jellyfish, and hydroids, requiring little ongoing maintenance or cost.

### 263 *Applications and expansion*

264 Under different light conditions, dinoflagellates adjust their photosystems, for example,  
265 increasing LHC pigments (peridinin, chl *a*, chl *c*<sub>2</sub>) in dark conditions and increasing antioxidants  
266 (diadinoxanthin) in light conditions (Johnsen et al. 1994). This response was successfully  
267 detected in *Cassiopea*-associated Symbiodiniaceae using our flow cytometry protocol. Dark-  
268 acclimated individuals displayed the highest peridinin and chl *a* & *c*<sub>2</sub> autofluorescence, while  
269 light-acclimated individuals displayed the lowest photopigment-associated autofluorescence (Fig  
270 4A-B). Green autofluorescence displayed the inverse pattern, where dark acclimated individuals  
271 possessed the faintest green-fluorescent signatures (antioxidants) (Fig 4C). The combination of

272 low LHC-associated photopigment autofluorescence and elevated antioxidant fluorescence in the  
273 light-acclimated group is likely indicative of stress, while high photopigment autofluorescence in  
274 conjunction with elevated antioxidant autofluorescence in variable-condition individuals  
275 suggests active stress-mitigation and acclimation (Fig 4). Dark-acclimated individuals with low  
276 antioxidant and high photopigment autofluorescence likely represent low stress-levels and  
277 successful acclimation (Fig 4). This acclimation experiment represents an example and empirical  
278 proof of concept for the application of our protocol for relatively simple comparisons of  
279 Symbiodiniaceae assemblages originating from different host individuals.

280         The ability to export fluorescent profiles for every observed Symbiodiniaceae cell has  
281 massive potential. As the interest in Symbiodiniaceae moves from characterization of  
282 biodiversity through the identification of clades via DNA metabarcoding to functional  
283 characterization and identification of differences in resilience, flow cytometry has the potential  
284 to reveal functional diversity of Symbiodiniaceae *in hospite*. For example, Symbiodiniaceae  
285 assemblages hosted in corals may harbor homogeneous Symbiodiniaceae assemblages with low  
286 phylogenetic diversity (one dominant genus, species, or strain) or diverse assemblages with high  
287 phylogenetic diversity (several codominant genera, species, or strains) (Davies et al. 2022). If a  
288 coral hosts a highly diverse Symbiodiniaceae assemblage, but only a single autofluorescent  
289 profile is detected using our flow cytometry protocol, one may assume functional redundancy of  
290 symbiont clades or mediation of symbiont physiology by the coral host (Fig. 5). Alternatively, if  
291 a coral hosts a low diversity Symbiodiniaceae assemblage, but multiple distinct autofluorescent  
292 profiles are detected, one may assume functional plasticity of the assemblage (Fig 5). We suggest  
293 that exploration of these concepts using flow cytometry has the potential for high-throughput  
294 characterization of Symbiodiniaceae functional diversity *in hospite*.

295 **Fig 5:** Phylogenetic diversity of Symbiodiniaceae assemblages *in-hospite* may indicate low  
296 complexity (one dominant clade) or high complexity (more than one dominant clade)  
297 communities (Davies et al. 2022). Autofluorescent profiles may be either convergent or  
298 divergent, as shown here by PCAs of consisting of chlorophylls (**Chl**), peridinin (**Per**), and  
299 antioxidants (**AO**). The combination of phylogenetic diversity and physiological profiles has the  
300 potential to allow for the classification of Symbiodiniaceae assemblage functional strategies into  
301 homogenous, plastic, redundant, or diverse categories. Simulated datasets were generated and  
302 analyzed using R.

303         The protocol presented here targets key LHC pigments and a combination of proteins  
304 known for their role in photo-acclimation and stress mitigation. Given the diverse set of  
305 autofluorescent targets and available laser/filter combinations for the detection of  
306 excitation/emission spectra, this protocol may be further expanded, establishing flow cytometry  
307 as a cost-effective and robust technique for profiling Symbiodiniaceae physiology. For example,  
308 the implementation of filters that separate chl *a* & *c*<sub>2</sub> would permit more intimate insight into  
309 LHC rearrangements during photoacclimation. Other laser/filter combinations may also facilitate  
310 physiological profiling of photo-autotrophs with alternative LHC pigments, such as fucoxanthin-  
311 containing dinoflagellates (Jeffrey 1989; Yoon et al. 2002) or phycoerythrin-containing marine  
312 cyanobacteria (Siddiqui and Carpenter 1992; Subramaniam and Carpenter 1999).

313

### 314 **Acknowledgements**

315 We would like to thank Rebecca Salas for running the upside-down jellyfish acclimation  
316 experiment. We would also like to thank MacKenzie Heagy for illustrating the coral-  
317 dinoflagellate assemblages shown in Fig 5. Guam NSF EPSCoR directly supported this work

318 through the National Science Foundation award OIA-1946352. Any opinions, findings,  
319 conclusions, or recommendations expressed in this contribution are those of the authors and do  
320 not necessarily reflect the views of the National Science Foundation.

321

### 322 **Conflict of Interest**

323 The authors declare no conflict of interest.

324

### 325 **Supporting Information**

326 **S1 File. Protocol to quantify photophysiology of endosymbiotic dinoflagellates using the**

327 **Guava Flow Cytometer.** Also available on protocols.io:

328 <https://dx.doi.org/10.17504/protocols.io.dm6gpjr2jgzp/v1>

329

### 330 **Author Contributions**

331 **Conceptualization:** Colin J Anthony, Colin C Lock, Bastian Bentlage

332 **Data Curation:** Colin J Anthony

333 **Formal Analysis:** Colin J Anthony

334 **Funding Acquisition:** Bastian Bentlage

335 **Investigation:** Colin J Anthony, Colin C Lock

336 **Methodology:** Colin J Anthony, Colin C Lock

337 **Project Administration:** Colin J Anthony, Bastian Bentlage



- 338 **Resources:** Colin C Lock, Bastian Bentlage
- 339 **Software:** Colin J Anthony
- 340 **Supervision:** Bastian Bentlage, Colin C Lock
- 341 **Validation:** Colin J Anthony, Colin C Lock, Bastian Bentlage
- 342 **Visualization:** Colin J Anthony
- 343 **Writing – Original Draft Preparation:** Colin J Anthony
- 344 **Writing – Review & Editing:** Bastian Bentlage, Colin J Anthony, Colin C Lock
- 345

## 346 **References**

- 347 Berg JT, David CM, Gabriel MM, Bentlage B. Fluorescence signatures of persistent photosystem  
348 damage in the staghorn coral *Acropora cf. pulchra* (Anthozoa: Scleractinia) during  
349 bleaching and recovery, *Mar. Biol. Res.* 2021; 16(8-9):643-655.  
350 <https://doi.org/10.1080/17451000.2021.1875245>
- 351 Bricaud A, Claustre H, Ras J Oubelkheir K. Natural variability of phytoplanktonic absorption in  
352 oceanic waters: Influence of the size structure of algal populations. *J. Geophysical*  
353 *Research Oceans.* 2004; 109(C11). <https://doi.org/10.1029/2004JC002419>.
- 354 Bujak Ł, Piatkowski D, Mackowski S, Wörmke S, Jungb C, Bräuchleb C, Agarwal A, Kotovc  
355 NA, Schulted T, Hofmann E, Brotosudarmoe THP, Scheere H, Govorovf AO, Hilleret  
356 RG. Plasmon enhancement of fluorescence in single light-harvesting complexes from  
357 *Amphidinium carterae*. *Acta Phys. Pol.* 2009; 116:S22-S25.  
358 <https://doi.org/10.12693/APhysPolA.116.S-22>
- 359 Burton GW. Antioxidant properties of carotenoids. *J. Nutr.* 1990; 119:109–111.
- 360 Davies S, Gamache MH, Howe-Kerr LI, Kriefall NG, Baker AC, Banaszak AT, Bay LK,  
361 Bellantuono AJ, Bhattacharya DC, Debashish C, et al. Building consensus around the  
362 assessment and interpretation of Symbiodiniaceae diversity. 2022.  
363 <https://doi.org/10.20944/preprints202206.0284.v1>
- 364 D’Amico-Damião V, Carvalho RF. Cryptochrome-related abiotic stress responses in plants.  
365 *Front. Plant Sci.* 2018; 19. <https://doi.org/10.3389/fpls.2018.01897>

- 366 Deng B, Jin X, Yang Y, Lin Z, Zhang Y. The regulatory role of riboflavin in the drought  
367 tolerance of tobacco plants depends on ROS production. *Plant Growth Regul.* 2014;  
368 72:269–277. <https://doi.org/10.1007/s10725-013-9858-8>
- 369 Dubelaar GB, Jonker RR. Flow cytometry as a tool for the study of phytoplankton. *Scientia*  
370 *Marina.* 2000; 64(2):135-136. <https://doi.org/10.3989/scimar.2000.64n2135>
- 371 Fernandes de Barros Marangoni L, Ferrier-Pagès C, Rottier C Bianchini A, Grover R.  
372 Unravelling the different causes of nitrate and ammonium effects on coral bleaching. *Sci.*  
373 *Rep.* 2020; 10:11975. <https://doi.org/10.1038/s41598-020-68916-0>
- 374 Frank, Cua A, Chynwat V, Young A, Gosztola D, Wasielewski MR. The lifetimes and energies  
375 of the first excited singlet states of diadinoxanthin and diatoxanthin: the role of these  
376 molecules in excess energy dissipation in algae. *Biochim. Biophys. Acta Bioenerg.* 1996;  
377 1277:243-252.
- 378 Fujita S, Iseki M, Yoshikawa S, Makino Y, Watanabe M, Motomura T, Kawai H, Murakami A.  
379 Identification and characterization of a fluorescent flagellar protein from the brown alga  
380 *Scytosiphon lomentaria* (Scytosiphonales, Pheophyceae): a flavoprotein homologous to  
381 Old Yellow enzyme. *Eur. J. Phycol.* 2005; 40:159-167.  
382 <https://doi.org/10.1080/09670260500063193>
- 383 Hennige SJ, Suggett DJ, Warner ME, McDougall KE, Smith DJ. Photobiology of *Symbiodinium*  
384 revisited: Bio-physical and bio-optical signatures. *Coral Reefs.* 2009; 28:179-195.  
385 <https://doi.org/10.1007/s00338-008-0444-x>
- 386 Hiller RG, Wrench PM, Gooley AP, Shoebridge G, Breton J. The major intrinsic light-  
387 harvesting protein of *Amphidinium*: Characterization and relation to other light-

- 388 harvesting proteins. *Photochem. Photobiol.* 1993; 57(1):125–131.
- 389 <https://doi.org/10.1111/j.1751-1097.1993.tb02267.x>
- 390 Hoegh-Guldberg O. Climate change, coral bleaching and the future of the world's coral reefs.
- 391 *Mar. Freshw. Res.* 1999; 50:839-866.
- 392 Jeffrey SW. Chlorophyll c pigments and their distribution in the chromophyte algae. In: Green
- 393 JC, Leadbeater BSC, Diver WL. (eds) *The Chromophyte Algae: Problems and*
- 394 *Perspective.* Systematics Association. Clarendon, Oxford. 1989; 38:13–36.
- 395 Jiang J, Zhang H, Kang Y, Bina D, Lo CS, Blakeship RE. Characterization of the peridinin–
- 396 chlorophyll *a*-protein complex in the dinoflagellate *Symbiodinium*. *Biochim. Biophys.*
- 397 *Acta Bioenerg.* 2012; 1817(7):983-989. <https://doi.org/10.1016/j.bbabbio.2012.03.027>
- 398 Johnsen G, Nelson NB, Jovine RVM, Prézélin BB. Chromoprotein- and pigment-dependent
- 399 modeling of spectral light absorption in two dinoflagellates, *Prorocentrum minimum* and
- 400 *Heterocapsa pygmaea*. *Mar. Ecol. Prog. Ser.* 1994; 114(3):245-258.
- 401 Kagatani K, Nagao R, Shen JR, Yamano Y, Takaichi S, Akimoto S. Excitation relaxation
- 402 dynamics of carotenoids constituting the diadinoxanthin cycle. *Photosynth. Res.* 2022;
- 403 154:13-19. <https://doi.org/10.1007/s11120-022-00944-5>
- 404 Kanazawa A, Blanchard GJ, Szabó M, Ralph PJ, Kramer DM. The site of regulation of light
- 405 capture in *Symbiodinium*: Does the peridinin–chlorophyll *a*-protein detach to regulate
- 406 light capture? *Biochim. Biophys. Acta Bioenerg.* 2014; 1837(8):1227-1234.
- 407 <https://doi.org/10.1016/j.bbabbio.2014.03.019>

- 408 Kassambara, A. ggpubr: 'ggplot2' Based Publication Ready Plots. R package version 0.4.0. 2020.  
409 <https://CRAN.R-project.org/package=ggpubr>
- 410 Kawalska D, Krajnik B, Olejnik M, Twardowska M, Czechowski N, Hofmann E, Mackowski S.  
411 Metal-enhanced fluorescence of chlorophylls in light-harvesting complexes coupled to  
412 silver nanowires. *Sci. World J.* 2013; 2013:670412 <https://doi.org/10.1155/2013/670412>
- 413 Kleinegris DMM, van ES MA, Janssen M, Brandenburg WA, Wijffels RH. (2010) Carotenoid  
414 fluorescence in *Dunaliella salina*. *J. Appl. Phycol.* 22:645-649.  
415 <https://doi.org/10.1007/s10811-010-9505-y>
- 416 Koyama Y, Hashimoto H. Spectroscopic studies of carotenoids in photosynthetic systems. In:  
417 Young AJ, Britton G. (eds) *Carotenoids in Photosynthesis*. Springer, Dordrecht. 1993.  
418 [https://doi.org/10.1007/978-94-011-2124-8\\_9](https://doi.org/10.1007/978-94-011-2124-8_9)
- 419 Koziol B, Markowicz M, Kruk J, Plytycz B. Riboflavin as a source of autofluorescence in  
420 *Eisenia fetida* coelomocytes. *Photochem. Photobiol.* 2007; 82(2):570-3.  
421 <https://doi.org/10.1562/2005-11-23-RA-738>
- 422 Krediet CJ, DeNofrio JC, Caruso C, Burriesci MS, Cella K, Pringle JR. Rapid, Precise, and  
423 Accurate Counts of *Symbiodinium* Cells Using the Guava Flow Cytometer, and a  
424 Comparison to Other Methods. *PLOS ONE*. 2015; 10(8):e0135725.  
425 <https://doi.org/10.1371/journal.pone.0135725>
- 426 Lee CS, Yeo YSW, Sin TM. Bleaching response of *Symbiodinium* (zooxanthellae):  
427 Determination by flow cytometry. *Cytom. Part A*. 2012; 81A(10):888-895.  
428 <https://doi.org/10.1002/cyto.a.22111>

- 429 Lesser MP. Oxidative stress in marine environments: Biochemistry and physiological ecology.  
430 *Annu. Rev. Physiol.* 2006; 68:253-278.  
431 <https://doi.org/10.1146/annurev.physiol.68.040104.110001>
- 432 Maruyama S, Shoguchi E, Satoh N, Minagawa J. Diversification of the light-harvesting complex  
433 gene family via intra- and intergenic duplications in the coral symbiotic alga  
434 *Symbiodinium*. *PLOS ONE*. 2015; 10:e0119406.
- 435 Mukherjee A, Walker J, Weyant KB, Schroeder CM. Characterization of Flavin-Based  
436 Fluorescent Proteins: An Emerging Class of Fluorescent Reporters. *PLOS ONE*. 2013;  
437 8(5):e64753. <https://doi.org/10.1371/journal.pone.0064753>
- 438 Muscatine L, Porter JW. Reef corals: Mutualistic symbioses adapted to nutrient-poor  
439 environments. *BioScience*. 1977; 27:454-460
- 440 Muscatine L, Falkowski PG, Porter JW, Dubinsky Z. Fate of photosynthetic fixed carbon in  
441 light- and shade-adapted colonies of the symbiotic coral *Stylophora pistillata*. *Proc. R.*  
442 *Soc. Lond. B*. 1984; 222:181–202.
- 443 Niedzwiedzki DM, Jiang Jing CSL, Blankenship RE. Spectroscopic properties of the  
444 Chlorophyll *a*–Chlorophyll *c*<sub>2</sub>–Peridinin-Protein-Complex (acpPC) from the coral  
445 symbiotic dinoflagellate *Symbiodinium*. *Photosynth. Res.* 2014; 120:125-139.  
446 <https://doi.org/10.1007/s11120-013-9794-5>
- 447 Ogle DH, JC Doll, Wheeler P, Dinno A. FSA: Fisheries Stock Analysis. R package version  
448 0.9.3. 2022. <https://github.com/fishR-Core-Team/FSA>

- 449 Polivka T, Hiller RG, Frank HA. Spectroscopy of the peridinin–chlorophyll-*a* protein: insight  
450 into light-harvesting strategy of marine algae. Arch Biochem. Biophys. 2007; 458: 111–  
451 120. <https://doi.org/10.1016/j.abb.2006.10.006>
- 452 R Core Team. R: A language and environment for statistical computing. R Foundation for  
453 Statistical Computing, Vienna, Austria. 2021. <https://www.R-project.org/>
- 454 RStudio Team. RStudio: Integrated Development for R. RStudio, PBC, Boston, MA. 2020.  
455 <http://www.rstudio.com/>
- 456 Sandoval FJ, Zhang Y, Roje S. Flavin nucleotide metabolism in plants. J. Biol. Chem. 2008;  
457 283(45):30890-30900. <https://doi.org/10.1074/jbc.M803416200>
- 458 Schoefs B. Chlorophyll and carotenoid analysis in food products. Properties of the pigments and  
459 methods of analysis. Trends Food Sci. Technol. 2002; 13(11):361-371.  
460 [https://doi.org/10.1016/S0924-2244\(02\)00182-6](https://doi.org/10.1016/S0924-2244(02)00182-6)
- 461 Siddiqui PJA, Carpenter EJ. Ultrastructure and immunolocalization of phycobiliproteins and  
462 ribulose 1,4-bisphosphate carboxylase/oxygenase in the marine cyanobacterium  
463 *Trichodesmium thiebautii*. J. Phycol. 1992; 28: 320–327.
- 464 Smerilli A, Orefice I, Corato F, Olea AG, Ruban AV, Brunet C. Photoprotective and antioxidant  
465 responses to light spectrum and intensity variations in the coastal diatom *Skeletonema*  
466 *marinoi*. Environ. Microbiol. 2016; 19(2):611-627. [https://doi.org/10.1111/1462-  
467 2920.13545](https://doi.org/10.1111/1462-2920.13545)
- 468 Subramaniam A, Carpenter EJ. Bio-optical properties of the marine cyanobacteria  
469 *Trichodesmium* spp. I. Absorption and photosynthetic spectra. Limnol. Oceanogr. 1999;  
470 44: 608–617.

- 471 Suprasi KM, Kumar M, Segecova A, McCauley JI, Herdean A, Padula MP, O’Meara T, Ralph  
472 PJ. Characterisation and bioactivity analysis of peridinin-chlorophyll *a*-protein (PCP)  
473 isolated from *Symbiodinium tridacnidorum* CS-73. J. Mar. Sci. Eng. 2021; 9(12):1387.  
474 <https://doi.org/10.3390/jmse9121387>
- 475 Suwa R, Hirose M, Hidaka M. Seasonal fluctuation in zooxanthellar genotype composition and  
476 photophysiology in the corals *Pavona divaricata* and *P. decussata*. Mar. Ecol. Prog. Ser.  
477 2008; 381:129-137.
- 478 Taheri P, Tarighi S. Riboflavin induces resistance in rice against *Rhizoctonia solani* via  
479 jasmonate-mediated priming of phenylpropanoid pathway. J. Plant Physiol. 2010;  
480 167:201–208. <https://10.1016/j.jplph.2009.08.003>
- 481 Venn AA, Wilson MA, Trapido-Rosenthal HG, Keely BJ, Douglas AE. The impact of coral  
482 bleaching on the pigment profile of the symbiotic alga, *Symbiodinium*. Plant Cell  
483 Environ. 2006; 29:2133-2142. <https://doi.org/10.1111/j.1365-3040.2006.001587.x>
- 484 Warner ME, Fitt WK, Schmidt GW. The effects of elevated temperature on the photosynthetic  
485 efficiency of zooxanthellae *in hospite* from four different species of reef coral: a novel  
486 approach. Plant Cell Environ. 1996; 19(3):291-299. [https://doi.org/10.1111/j.1365-  
487 3040.1996.tb00251.x](https://doi.org/10.1111/j.1365-3040.1996.tb00251.x)
- 488 Wickham H. ggplot2: Elegant Graphics for Data Analysis. Springer New York. 2016.  
489 <https://doi.org/10.1007/978-0-387-98141-3>
- 490 Yacobi YZ. From Tswett to identified flying objects: A concise history of chlorophyll *a* use for  
491 quantification of phytoplankton. Isr. J. Plant Sci. 2012; 60(1).  
492 <https://doi.org/10.1560/IJPS.60.1-2.243>



- 493 Yoon HS, Havkett JD, Bhattacharya D. A single origin of the peridinin- and fucoxanthin-  
494 containing plastids in dinoflagellates through tertiary endosymbiosis. PNAS. 2002;  
495 99(18):11724-11729.
- 496 Young A. Britton G. Carotenoids in Photosynthesis. Chapman and Hall, London, England. 1993.
- 497 Yu X, Liu H, Klejnot J, Lin C. The Cryptochrome Blue Light Receptors. Arabidopsis Book  
498 2010; 8:e0135. <https://doi.org/10.1199/tab.0135>
- 499 Zapata M, Edvardsen B, Rodriguez F, Maestro MA, Garrido JL. Chlorophyll *c*<sub>2</sub>  
500 monogalactosyldiacylglyceride ester (chl *c*<sub>2</sub>- MGDG). A novel marker pigment for  
501 *Chrysochromulina* species (Haptophyta). Mar. Ecol. Prog. Ser. 2001; 219:85-98.  
502 <https://www.doi.org/10.3354/meps219085>

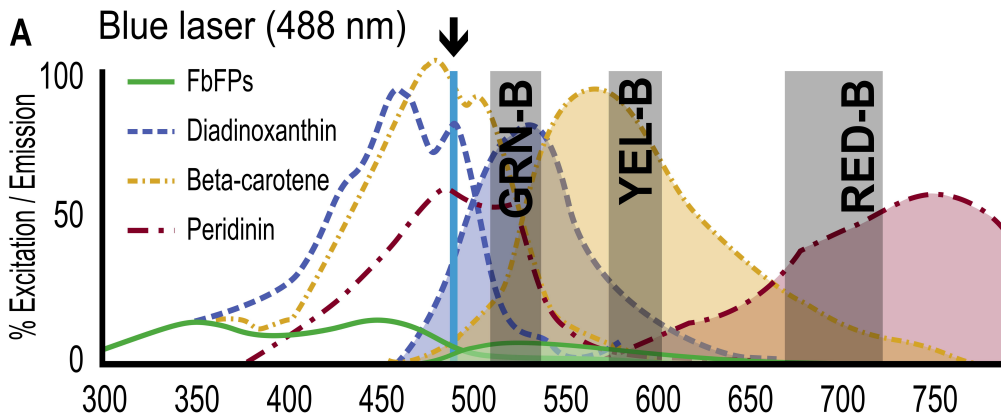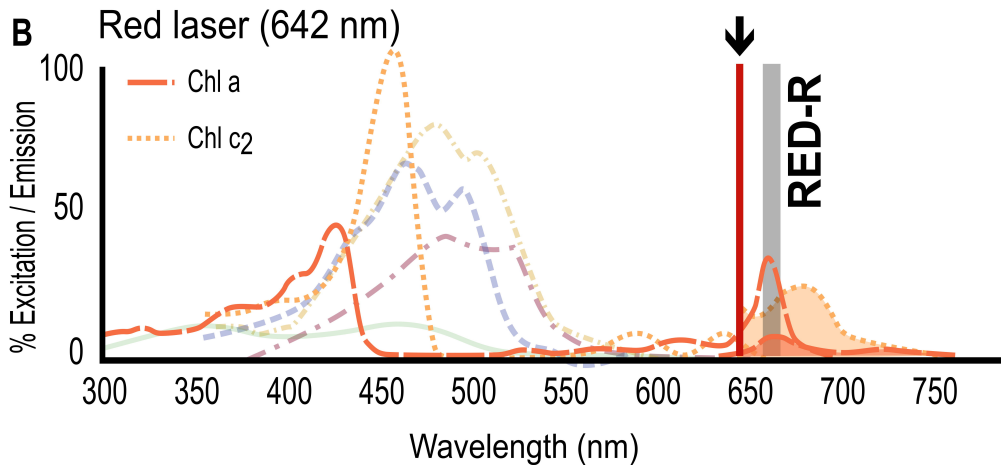

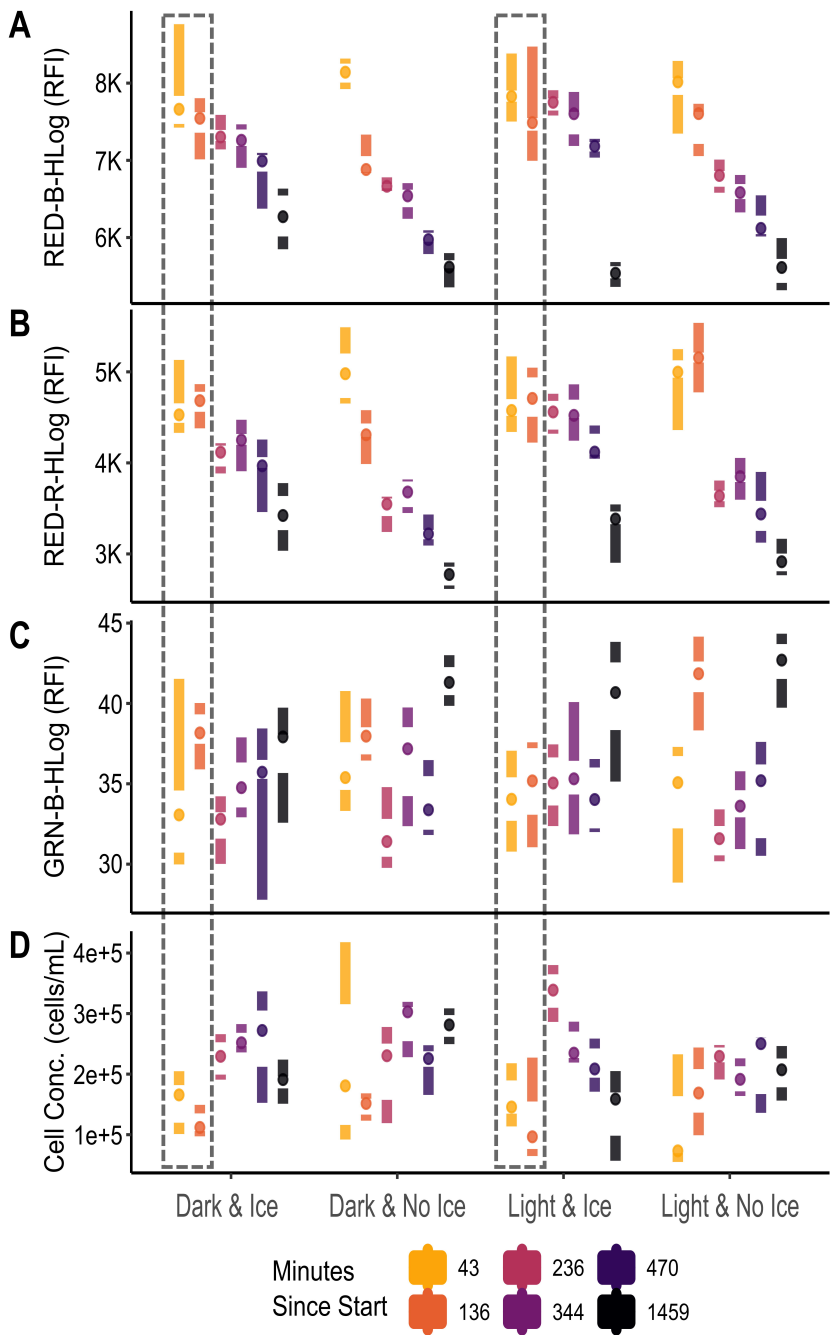

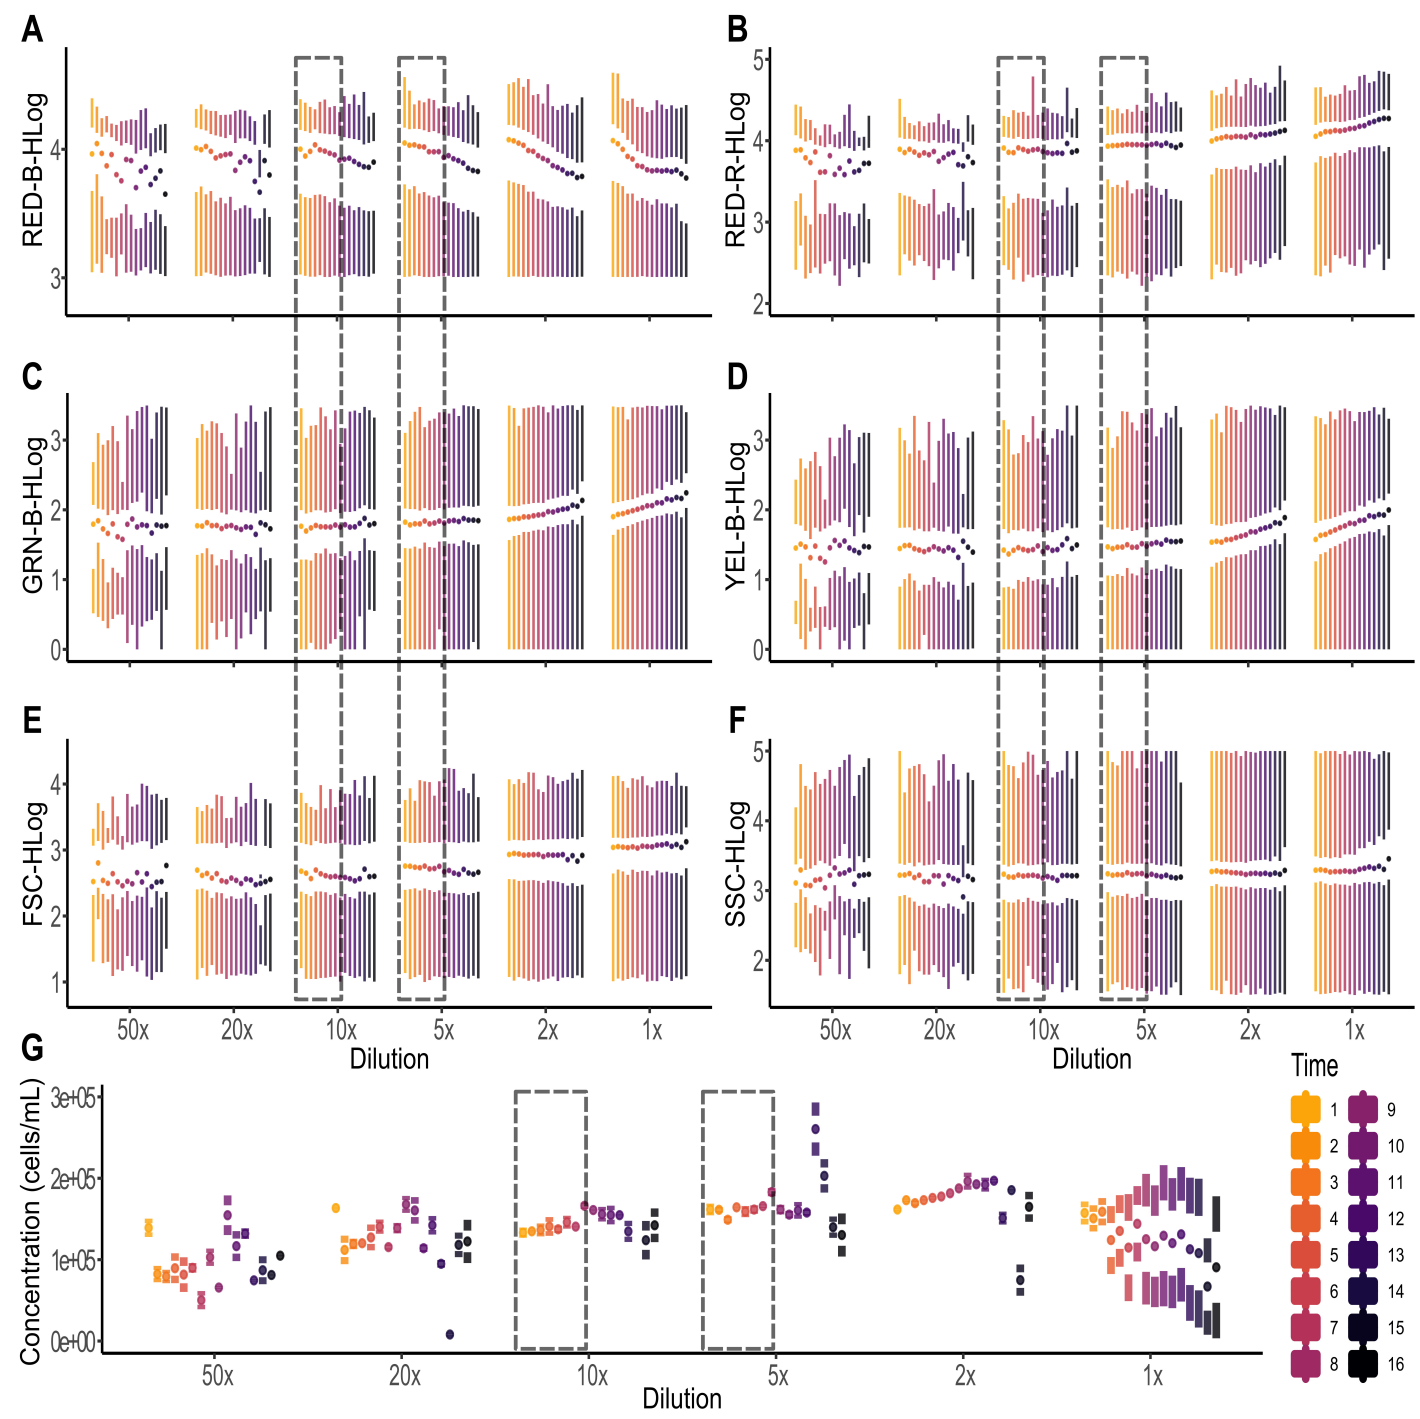

**A**

RED-B-HLog

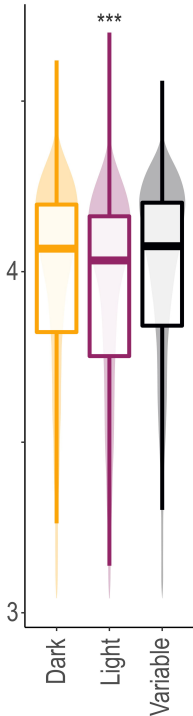**B**

RED-R-HLog

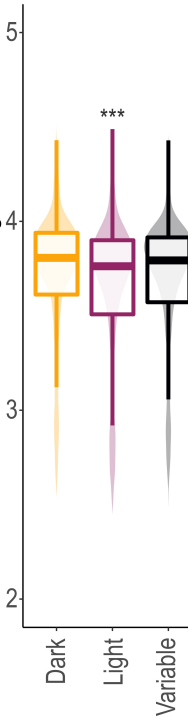**C**

GRN-B-HLog

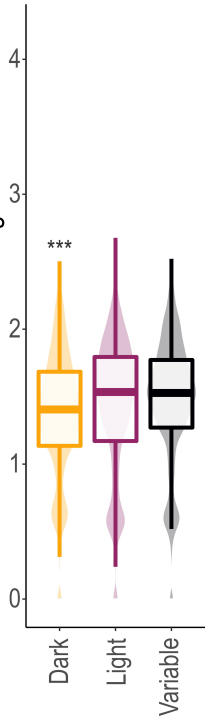

# Genetic Diversity

Low complexity

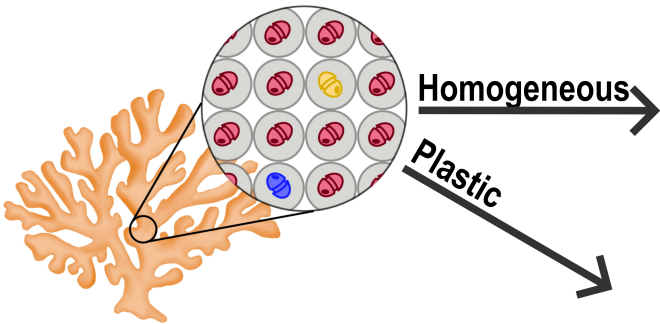

High complexity

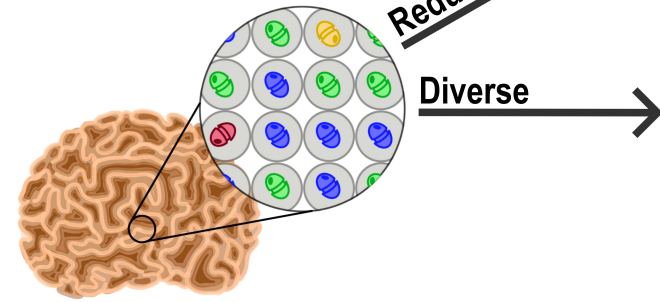

# Physiological Profile

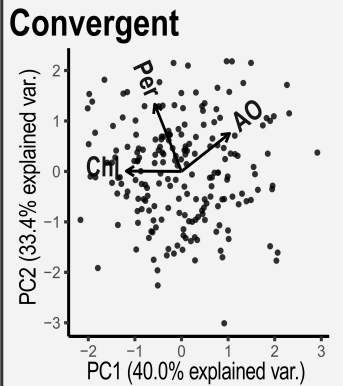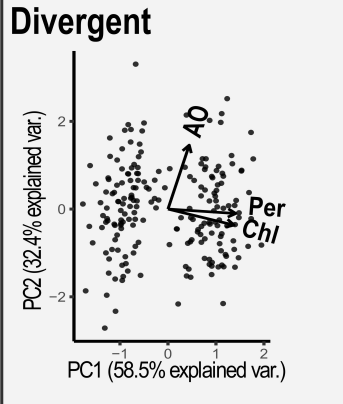

Source: https://www.biorxiv.org/content/10.1101/2022.12.06.519248v1.full.pdf
